# Supplementary material for: Syndecan-1 Depletion Has a Differential Impact on Hyaluronic Acid Metabolism and Tumor Cell Behavior in Luminal and Triple-Negative Breast Cancer Cells
Source: MDPI journal article supplement (doi:10.3390/ijms22115874), 2021-05-30
Supplement: s1 [file s1]

## Supplementary Files. Syndecan-1 depletion has a differential impact on hyaluronic acid metabolism and tumor cell behavior in luminal and triple negative breast cancer cells.

Valla SA, Hassan N, Vitale DL, Madanes D, Spinelli FM, Texeira FCOB, Greve B, Espinoza-Sánchez NA, Cristina C, Alaniz L, Götte M

### Supplementary Figures

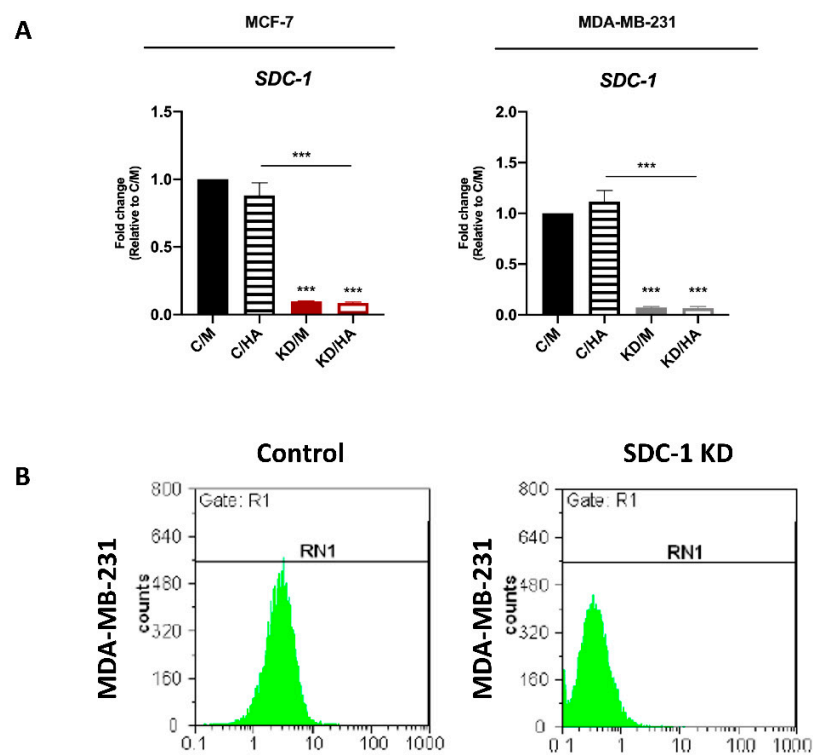

**Supplementary Figure 1.** siRNA transfection against Sdc-1 reduced its mRNA expression in 95% in both MDA-MB-231 and MCF-7 cells. **A)** *Sdc-1* expression was determined by RT-qPCR after 48 hours post-transfection, normalized to  $\beta$ -*ACTIN* expression and plotted as fold of C/M. **B)** Protein levels of Sdc-1 as determined by flow cytometry in control and Sdc-1 KD MDA-MB-231 cells. Representative images are shown. Data represent the mean $\pm$ SEM from 3 independent experiments. Asterisks represent comparisons with statistically significant differences (\*\* $p < 0.01$ ).

# MDA-MB-231

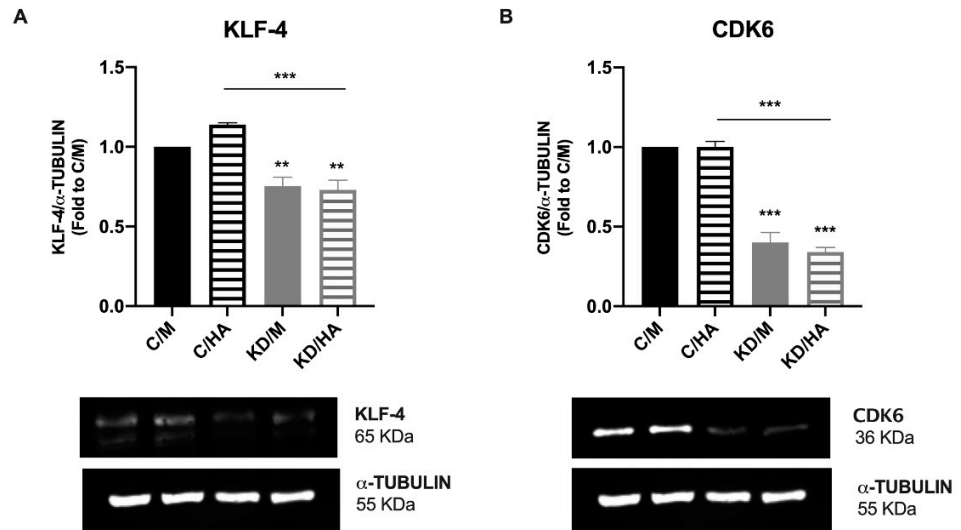

**Supplementary Figure 2. Sdc-1-deficient MDA-MB-231 cells have reduced levels of KLF-4 and CDK6 proteins.** KLF-4 (A) and CDK6 (B) protein levels were detected by Western Blot, normalized to α-TUBULIN levels, and plotted as fold of C/M. Representative bands are shown. Data represent the mean±SEM from 4 independent experiments. Asterisks represent comparisons with statistically significant differences (\*p<0,05, \*\*p<0,01).

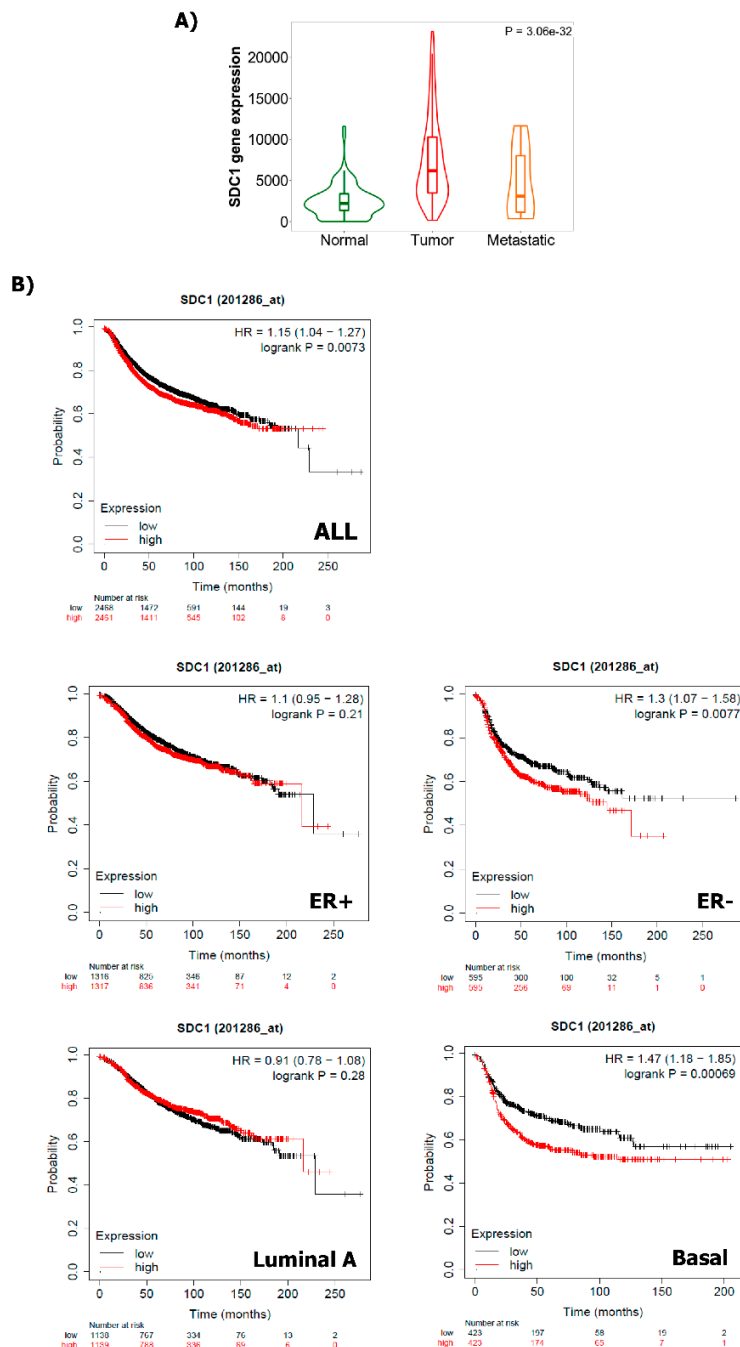

**Supplementary Figure 3. The differential expression and the prognostic value of Sdc-1 in tumor tissues of breast cancer patients.** (A) Violin plots of Sdc-1 gene expression in non-tumor, primary and metastatic breast cancer tumor samples. The statistical significance cutoff was set at  $p < 0.01$ . (B) Kaplan-Meier relapse-free survival curves are plotted for breast cancer patients with unfiltered patients (All), and patients of the estrogen receptor-positive (ER+), estrogen receptor-negative (ER-), Luminal A, and Basal subtypes and the expression of Sdc-1. Log-rank p values and hazard ratios (HRs; 95 % confidence interval in parentheses) are shown.

**Supplementary Tables.**

**Supplementary Table 1. GO enrichment analysis associated with SDC-1 and proteins of interest investigated in this study. The STRING program was used to perform this analysis.**

| Category                  | Pathway description                                       | Observed gene count | False discovery rate (FDR) | Matching proteins in your network (labels)                                                                                                                                               |
|---------------------------|-----------------------------------------------------------|---------------------|----------------------------|------------------------------------------------------------------------------------------------------------------------------------------------------------------------------------------|
| <b>Biological Process</b> | GO:0006027-glycosaminoglycan catabolic process            | 15                  | 2.06E-21                   | DCN,GPC1,FGF2,GPC2,SDC2,BGN,SDC3,GPC4,SDC4,HSPG2,GPC6,GPC5,AGRN,SDC1,GPC3                                                                                                                |
|                           | GO:0030203-glycosaminoglycan metabolic process            | 17                  | 5.91E-20                   | DCN,HGF,GPC1,FGF2,GPC2,HAS2,SDC2,BGN,SDC3,GPC4,SDC4,HSPG2,GPC6,GPC5,AGRN,SDC1,GPC3                                                                                                       |
|                           | GO:0006024-glycosaminoglycan biosynthetic process         | 15                  | 3.00E-19                   | DCN,GPC1,GPC2,HAS2,SDC2,BGN,SDC3,GPC4,SDC4,HSPG2,GPC6,GPC5,AGRN,SDC1,GPC3                                                                                                                |
|                           | GO:0009653-anatomical structure morphogenesis             | 33                  | 9.26E-18                   | DCN,EFNB1,MAPK1,HGF,SERPINE1,NANOG,EFNB2,POU5F1,THBS1,GPC1,FGF2,STAT3,EGF,S100B,TDGF1,SHH,HAS2,SDC2,MET,SOX2,FGFR3,FN1,SDC4,SRG,HSPG2,SDC1,GPC3,ITGB1,FGFR1,FGFR2,DAG1,VEGFA,FGF1        |
|                           | GO:0007166-cell surface receptor signaling pathway        | 34                  | 1.17E-17                   | DCN,EFNB1,MAPK1,HGF,NANOG,EFNB2,POU5F1,SDCBP,FGF2,STAT3,EGF,GPC2,FGFR4,SHH,IGF1,SDC2,MET,SOX2,BGN,FGFR3,FN1,GPC4,SRG,GPC6,SDC1,FGFBP1,AFP,ITGB1,NOTUM,FGFR1,FGFR2,IL5RA,VEGFA,FGF1       |
|                           | GO:0050793-regulation of developmental process            | 34                  | 2.02E-16                   | DCN,MAPK1,HGF,SERPINE1,NANOG,EFNB2,POU5F1,SDCBP,THBS1,GPC1,FGF2,STAT3,EGF,S100B,SHH,IGF1,HAS2,SDC2,SOX2,FGFR3,FN1,GPC4,SRG,HSPG2,GPC6,AGRN,FGFBP1,GPC3,ITGB1,FGFR1,FGFR2,DAG1,VEGFA,FGF1 |
|                           | GO:0051239-regulation of multicellular organismal process | 35                  | 1.22E-15                   | DCN,MAPK1,HGF,SERPINE1,EFNB2,POU5F1,SDCBP,THBS1,GPC1,FGF2,STAT3,EGF,S100B,TDGF1,SHH,IGF1,HAS2,SDC2,MET,SOX2,FN1,GPC4,SRG,HSPG2,                                                          |

|                           |                                                                    |    |          |                                                                                                                                                                   |
|---------------------------|--------------------------------------------------------------------|----|----------|-------------------------------------------------------------------------------------------------------------------------------------------------------------------|
|                           |                                                                    |    |          | GPC6,AGRN,FGFBP1,GPC3,ITGB1,FGFR1,FGFR2,IL5RA,DAG1,VEGFA,FGF1                                                                                                     |
|                           | GO:0022603-regulation of anatomical structure morphogenesis        | 24 | 1.26E-15 | DCN,HGF,SERPINE1,POU5F1,THBS1,FGF2,STAT3,S100B,SHH,HAS2,SDC2,FN1,GPC4,SRC,HSPG2,GPC6,FGFBP1,GPC3,ITGB1,FGFR1,FGFR2,DAG1,VEGFA,FGF1                                |
|                           | GO:0030334-regulation of cell migration                            | 22 | 1.84E-15 | DCN,MAPK1,HGF,SERPINE1,SDCBP,THBS1,FGF2,STAT3,EGF,TDGF1,SHH,IGF1,HAS2,MET,FN1,SDC4,SRC,FGFBP1,FGFR1,DAG1,VEGFA,FGF1                                               |
|                           | GO:2000026-regulation of multicellular organismal development      | 30 | 2.11E-15 | DCN,HGF,SERPINE1,EFNB2,POU5F1,SDCBP,THBS1,GPC1,FGF2,STAT3,EGF,S100B,SHH,IGF1,SDC2,SOX2,FN1,GPC4,SRC,HSPG2,GPC6,AGRN,FGFBP1,GPC3,ITGB1,FGFR1,FGFR2,DAG1,VEGFA,FGF1 |
| <b>Molecular Function</b> | GO:0050840-extracellular matrix binding                            | 10 | 1.48E-13 | DCN,THBS1,GPC1,NID1,SHH,BGN,AGRN,ITGB1,DAG1,VEGFA                                                                                                                 |
|                           | GO:0004713-protein tyrosine kinase activity                        | 13 | 3.25E-13 | EFNB1,HGF,EFNB2,FGF2,EGF,FGFR4,MET,FGFR3,SRC,FGFR1,FGFR2,IL5RA,FGF1                                                                                               |
|                           | GO:0046934-phosphatidylinositol-4,5-bisphosphate 3-kinase activity | 10 | 6.66E-13 | HGF,FGF2,EGF,FGFR4,MET,FGFR3,SRC,FGFR1,FGFR2,FGF1                                                                                                                 |
|                           | GO:0005539-glycosaminoglycan binding                               | 13 | 1.25E-12 | DCN,THBS1,FGF2,FGFR4,SHH,BGN,FN1,AGRN,FGFBP1,FGFR1,FGFR2,VEGFA,FGF1                                                                                               |
|                           | GO:0017134-fibroblast growth factor binding                        | 7  | 2.60E-11 | THBS1,GPC1,FGFR4,FGFR3,FGFBP1,FGFR1,FGFR2                                                                                                                         |
|                           | GO:0043236-laminin binding                                         | 7  | 1.28E-10 | THBS1,GPC1,NID1,SHH,AGRN,ITGB1,DAG1                                                                                                                               |
|                           | GO:0008201-heparin binding                                         | 9  | 1.76E-08 | THBS1,FGF2,FGFR4,FN1,FGFBP1,FGFR1,FGFR2,VEGFA,FGF1                                                                                                                |
|                           | GO:0005102-signaling receptor binding                              | 20 | 1.88E-08 | EFNB1,HGF,SERPINE1,EFNB2,SDCBP,THBS1,FGF2,STAT3,EGF,S100B,TDGF1,SHH,IGF1,FN1,SRC,HSPG2,ITGB1,FGFR1,VEGFA,FGF1                                                     |
|                           | GO:1901681-sulfur compound binding                                 | 10 | 1.88E-08 | THBS1,FGF2,FGFR4,FN1,AGRN,FGFBP1,FGFR1,FGFR2,VEGFA,FGF1                                                                                                           |

|                           |                                                     |    |          |                                                                                                                                                                                                                             |
|---------------------------|-----------------------------------------------------|----|----------|-----------------------------------------------------------------------------------------------------------------------------------------------------------------------------------------------------------------------------|
|                           | GO:0004672-protein kinase activity                  | 14 | 2.01E-08 | EFNB1,MAPK1,HGF,EFNB2,FGF2,EGF,FGFR4,MET,FGFR3,Src,FGFR1,FGFR2,IL5RA,FGF1                                                                                                                                                   |
| <b>Cellular Component</b> | GO:0005576-extracellular region                     | 38 | 9.08E-21 | MAPK1,NID2,HGF,SERPINE1,SDCBP,THBS1,CDH1,GPC1,NID1,FGF2,EGF,S100B,GPC2,FGFR4,ALB,TDGF1,SHH,IGF1,MET,BGN,FGFR3,Fn1,GPC4,SDC4,HSPG2,GPC6,GPC5,AGRN,FGFBP1,GPC3,AFP,NOTUM,FGFR1,FGFR2,IL5RA,DAG1,VEGFA,FGF1                    |
|                           | GO:0005796-Golgi lumen                              | 15 | 6.08E-20 | DCN,GPC1,GPC2,SDC2,BGN,SDC3,GPC4,SDC4,HSPG2,GPC6,GPC5,AGRN,SDC1,GPC3,DAG1                                                                                                                                                   |
|                           | GO:0043202-lysosomal lumen                          | 14 | 1.07E-18 | DCN,GPC1,GPC2,SDC2,BGN,SDC3,GPC4,SDC4,HSPG2,GPC6,GPC5,AGRN,SDC1,GPC3                                                                                                                                                        |
|                           | GO:0005775-vacuolar lumen                           | 16 | 1.12E-18 | DCN,MAPK1,SDCBP,GPC1,GPC2,SDC2,BGN,SDC3,GPC4,SDC4,HSPG2,GPC6,GPC5,AGRN,SDC1,GPC3                                                                                                                                            |
|                           | GO:0031012-extracellular matrix                     | 18 | 1.57E-18 | NID2,SERPINE1,THBS1,GPC1,NID1,GPC2,SHH,BGN,Fn1,GPC4,HSPG2,GPC6,GPC5,AGRN,GPC3,DAG1,VEGFA,FGF1                                                                                                                               |
|                           | GO:0005615-extracellular space                      | 23 | 1.07E-13 | HGF,SERPINE1,SDCBP,THBS1,GPC1,FGF2,EGF,S100B,GPC2,ALB,TDGF1,SHH,IGF1,Fn1,GPC6,GPC5,FGFBP1,GPC3,AFP,IL5RA,DAG1,VEGFA,FGF1                                                                                                    |
|                           | GO:0062023-collagen-containing extracellular matrix | 12 | 2.05E-13 | NID2,SERPINE1,NID1,GPC2,Fn1,GPC4,HSPG2,GPC6,GPC5,AGRN,GPC3,DAG1                                                                                                                                                             |
|                           | GO:0071944-cell periphery                           | 41 | 2.52E-13 | EFNB1,MAPK1,NID2,SERPINE1,EFNB2,SDCBP,THBS1,CDH1,GPC1,NID1,STAT3,EGF,GPC2,FGFR4,TDGF1,SHH,IGF1,HAS2,SDC2,MET,BGN,FGFR3,SDC3,Fn1,GPC4,SDC4,Src,HSPG2,GPC6,GPC5,AGRN,SDC1,FGFBP1,GOLM1,GPC3,ITGB1,FGFR1,FGFR2,IL5RA,DAG1,FGF1 |
|                           | GO:0005764-lysosome                                 | 17 | 2.77E-12 | DCN,MAPK1,SDCBP,GPC1,GPC2,SDC2,BGN,SDC3,GPC4,SDC4,Src,HSPG2,GPC6,GPC5,AGRN,SDC1,GPC3                                                                                                                                        |
|                           | GO:0005886-plasma membrane                          | 39 | 7.73E-12 | EFNB1,MAPK1,NID2,SERPINE1,EFNB2,SDCBP,THBS1,CDH1,GPC1,STAT3,EGF,GPC2,FGFR4,TDGF1,SHH,                                                                                                                                       |

|                                |                                                                   |    |          |                                                                                                                              |
|--------------------------------|-------------------------------------------------------------------|----|----------|------------------------------------------------------------------------------------------------------------------------------|
|                                |                                                                   |    |          | IGF1,HAS2,SDC2,MET,BGN,FGFR3,SDC3,FN1,GPC4,SDC4,SRC,HSPG2,GPC6,GPC5,AGRN,SDC1,FGFBP1,GOLM1,GPC3,ITGB1,FGFR1,FGFR2,IL5RA,DAG1 |
| KEEG<br>enrichment<br>analysis | hsa05205-Proteoglycans in cancer                                  | 20 | 3.37E-24 | DCN,MAPK1,HGF,NANOG,THBS1,GPC1,FGF2,STAT3,SHH,IGF1,SDC2,MET,SDC4,SRC,HSPG2,SDC1,GPC3,ITGB1,FGFR1,VEGFA                       |
|                                | hsa04015-Rap1 signaling pathway                                   | 16 | 1.74E-17 | MAPK1,HGF,THBS1,CDH1,FGF2,EGF,FGFR4,IGF1,MET,FGFR3,SRC,ITGB1,FGFR1,FGFR2,VEGFA,FGF1                                          |
|                                | hsa01521-EGFR tyrosine kinase inhibitor resistance                | 11 | 2.19E-14 | MAPK1,HGF,FGF2,STAT3,EGF,IGF1,MET,FGFR3,SRC,FGFR2,VEGFA                                                                      |
|                                | hsa05200-Pathways in cancer                                       | 17 | 5.88E-13 | MAPK1,HGF,CDH1,FGF2,STAT3,EGF,FGFR4,SHH,IGF1,MET,FGFR3,ITGB1,FGFR1,FGFR2,IL5RA,VEGFA,FGF1                                    |
|                                | hsa04550-Signaling pathways regulating pluripotency of stem cells | 11 | 4.42E-12 | MAPK1,NANOG,POU5F1,FGF2,STAT3,FGFR4,IGF1,SOX2,FGFR3,FGFR1,FGFR2                                                              |
|                                | hsa04151-PI3K-Akt signaling pathway                               | 14 | 9.24E-12 | MAPK1,HGF,THBS1,FGF2,EGF,FGFR4,IGF1,MET,FGFR3,ITGB1,FGFR1,FGFR2,VEGFA,FGF1                                                   |
|                                | hsa05218-Melanoma                                                 | 9  | 1.44E-11 | MAPK1,HGF,CDH1,FGF2,EGF,IGF1,MET,FGFR1,FGF1                                                                                  |
|                                | hsa04014-Ras signaling pathway                                    | 12 | 2.04E-11 | MAPK1,HGF,FGF2,EGF,FGFR4,IGF1,MET,FGFR3,FGFR1,FGFR2,VEGFA,FGF1                                                               |
|                                | hsa04010-MAPK signaling pathway                                   | 12 | 3.02E-10 | MAPK1,HGF,FGF2,EGF,FGFR4,IGF1,MET,FGFR3,FGFR1,FGFR2,VEGFA,FGF1                                                               |
|                                | hsa05219-Bladder cancer                                           | 7  | 5.85E-10 | MAPK1,THBS1,CDH1,EGF,FGFR3,SRC,VEGFA                                                                                         |

**Supplementary Table 2. Statistical co-citation analysis associated with SDC-1 and proteins of interest investigated in this study. The STRING program was used to perform this analysis.**

| Pathway Description                                                                                                        | Observed gene count | False discovery rate | Matching proteins in your network (labels)                                                                                          |
|----------------------------------------------------------------------------------------------------------------------------|---------------------|----------------------|-------------------------------------------------------------------------------------------------------------------------------------|
| (2015) Insights into the key roles of proteoglycans in breast cancer biology and translational medicine.                   | 26                  | 2.76E-35             | DCN,HGF,SDCBP,THBS1,CDH1,GPC1,FGF2,STAT3,EGF,IGF1,SDC2,BGN,SDC3,FN1,SDC4,SRC,HSPG2,GPC6,GPC5,AGRN,SDC1,GPC3,ITGB1,NOTUM,FGFR1,VEGFA |
| (2015) Fell-Muir Lecture: Heparan sulphate and the art of cell regulation: a polymer chain conducts the protein orchestra. | 22                  | 5.29E-33             | GPC1,FGF2,GPC2,SHH,SDC2,MET,FGFR3,SDC3,FN1,GPC4,SDC4,SRC,HSPG2,GPC6,GPC5,AGRN,SDC1,GPC3,NOTUM,FGFR1,VEGFA,FGF1                      |
| (2010) Novel aspects of corneal angiogenic and lymphangiogenic privilege.                                                  | 23                  | 2.49E-32             | DCN,EFNB1,EFNB2,THBS1,CDH1,GPC1,NID1,FGF2,STAT3,GPC2,ALB,BGN,FN1,GPC4,SRC,HSPG2,GPC6,GPC5,SDC1,GPC3,FGFR1,VEGFA,FGF1                |
| (2017) Exploiting Heparan Sulfate Proteoglycans in Human Neurogenesis-Controlling Lineage Specification and Fate.          | 20                  | 5.31E-31             | GPC1,FGF2,EGF,S100B,GPC2,SHH,SDC2,SOX2,SDC3,GPC4,SDC4,SRC,HSPG2,GPC6,GPC5,AGRN,SDC1,GPC3,VEGFA,FGF1                                 |
| (2014) Syndecans as modulators and potential pharmacological targets in cancer progression.                                | 20                  | 5.31E-31             | HGF,THBS1,CDH1,GPC1,FGF2,EGF,GPC2,SDC2,SDC3,FN1,GPC4,SDC4,HSPG2,GPC6,GPC5,AGRN,SDC1,GPC3,FGFR1,VEGFA                                |
| (2019) Spotlight on the Transglutaminase 2-Heparan Sulfate Interaction.                                                    | 18                  | 1.14E-30             | SDCBP,GPC1,FGF2,GPC2,SHH,SDC2,SDC3,FN1,GPC4,SDC4,SRC,HSPG2,GPC6,GPC5,AGRN,GPC3,ITGB1,VEGFA                                          |
| (2008) Heparan sulfate proteoglycans: a GAGgle of skeletal-hematopoietic regulators.                                       | 20                  | 1.14E-30             | DCN,GPC1,NID1,FGF2,GPC2,SHH,SDC2,BGN,FGFR3,SDC3,FN1,GPC4,HSPG2,GPC6,GPC5,SDC1,GPC3,DAG1,VEGFA,FGF1                                  |
| (2007) The extracellular matrix and blood vessel formation: not just a scaffold.                                           | 20                  | 1.54E-30             | NID2,THBS1,GPC1,NID1,FGF2,EGF,GPC2,SDC2,SDC3,FN1,GPC4,SDC4,SRC,HSPG2,GPC6,GPC5,AGRN,SDC1,GPC3,VEGFA                                 |
| (2011) Proteoglycans in cancer biology, tumour microenvironment and angiogenesis.                                          | 20                  | 1.80E-30             | DCN,HGF,CDH1,GPC1,FGF2,EGF,GPC2,SDC2,FN1,GPC4,SDC4,SRC,HSPG2,GPC6,GPC5,SDC1,GPC3,FGFR1,VEGFA,FGF1                                   |



|                                                         |    |          |                                                                                            |
|---------------------------------------------------------|----|----------|--------------------------------------------------------------------------------------------|
| (2014) Matrix regulators in neural stem cell functions. | 18 | 1.34E-29 | CDH1,GPC1,FGF2,EGF,GPC2,SHH,FGFR3,SDC3,FN1,GPC4,SDC4,HSPG2,GPC6,GPC5,SDC1,GPC3,FGFR1,VEGFA |
|---------------------------------------------------------|----|----------|--------------------------------------------------------------------------------------------|

Supplementary Table 3. List of primers and probes used for RT-qPCR.

| Primer ID                 |                 | Sequence                 |
|---------------------------|-----------------|--------------------------|
| <b>SYBR Green primers</b> |                 |                          |
| HAS-2                     | <i>Forward</i>  | TACACAGCCTTCAGAGCACTG    |
|                           | <i>Reverse</i>  | ATGAGGCTGGGTCAAGCATAG    |
| RHAMM                     | <i>Forward</i>  | TGGAAAAGATGGAAGCAAGG     |
|                           | <i>Reverse</i>  | CCAGTGTAGCATTATTTGCAGAG  |
| PDGF-A                    | <i>Forward</i>  | TGCCTCTCCGCACTCACTG      |
|                           | <i>Reverse</i>  | AGAACATGGGCGAGGTATCC     |
| ACTB                      | <i>Forward</i>  | TCAAGATCATTGCTCCTCCTGAG  |
|                           | <i>Reverse</i>  | ACATCTGCTGGAAGGTGGACA    |
| GAPDH                     | <i>Forward</i>  | GGGGCTGCCCAGAACATCAT     |
|                           | <i>Reverse</i>  | GCCTGCTTCACCACCTTCTTG    |
| SDC-1                     | <i>Forward</i>  | AGGACGAAGGCAGCTACTCCT    |
|                           | <i>Reverse</i>  | TTTGGTGGGCTTCTGGTAGG     |
| IL-8                      | <i>Forward</i>  | CAAGAGCCAGGAAGAAACCA     |
|                           | <i>Reverse</i>  | AGCACTCCTTGGCAAACTG      |
| CD44                      | <i>Forward</i>  | GCCCATTGTTCACTTGTGCT     |
|                           | <i>Reverse</i>  | AAACCAGAGGAAGGGTGTGCTC   |
| CCND1                     | <i>Forward</i>  | GTCCTGTGACGCGCAAGTCT     |
|                           | <i>Reverse</i>  | ACATGTTGGTGCTGGGAAGC     |
| CD133                     | <i>Forward</i>  | TCAAAGATTGGCCATGTTCCAC   |
|                           | <i>Reverse</i>  | TGTCAGATGGAGTTACGCAGGTT  |
| OCT-4                     | <i>Forward</i>  | CTGGAGTTTGTGCCAGGGTTT    |
|                           | <i>Reverse</i>  | CTTCACCTTCCCTCCAACCAG    |
| TGF- $\beta$              | <i>Forward</i>  | TACCTGAACCCGTGTTGCTCTC   |
|                           | <i>Reverse</i>  | GTTGCTGAGGTATCGCCAGGAA   |
| MYC-2                     | <i>Forward</i>  | CAACCTCACAACCTTGGCTGA    |
|                           | <i>Reverse</i>  | CCAAAGTCCAATTTGAGGCAGTT  |
| WNT3A                     | <i>Forward</i>  | AGGTCCCACAGCCCTGAGAT     |
|                           | <i>Reverse</i>  | TCCAGGAAAGCGGACCATT      |
| WNT5A                     | <i>Forward</i>  | TCGTTAGCAGCATCAGTCCACA   |
|                           | <i>Reverse</i>  | GACCTGTGCCTTCGTGCCTA     |
| SFRP-1                    | <i>Forward</i>  | GATGCAGGAGGCTCAGGTGAT    |
|                           | <i>Reverse</i>  | GCTGGCAACAGGTCAGAACG     |
| KLF-4                     | <i>Forward</i>  | GCCTAAATGATGGTGCTTGGTG   |
|                           | <i>Reverse</i>  | GCAGTTTGAAAACCTTGGCTTCC  |
| TCF-7L1                   | <i>Forward</i>  | AAGGTGCCTGCCACTTCCTC     |
|                           | <i>Reverse</i>  | CCTGCCACTCTGGGATTGTG     |
| CCNB1                     | <i>Forward</i>  | TTTGGACAGTTTACCAGTTGCCTT |
|                           | <i>Reverse</i>  | CTCTTGAAGCARCGTATCACAGCA |
| TWIST                     | <i>Forward</i>  | GCGGCCAGGTACATCGACTT     |
|                           | <i>Reverse</i>  | TGCAGCTTGCCATCTTGGAG     |
| SNAIL                     | <i>Forward</i>  | CGAGCCCAGGCAGCTATTTTC    |
|                           | <i>Reverse</i>  | CCCGACAAGTGACAGCCATT     |
| MSI-2                     | <i>Forward</i>  | CCTAGTATGCTTGCCTCACAAACG |
|                           | <i>Reverse</i>  | CGTCATCAGGGAGAAGCACAG    |
| <b>Taqman probes</b>      |                 |                          |
| ACTB                      | <i>PROBE ID</i> | Hs 99999903 m1           |
| VEGFA                     | <i>PROBE ID</i> | Hs 00900054 m1           |
| ANGP1                     | <i>PROBE ID</i> | Hs 00181613 m1           |

|                    |                 |        |
|--------------------|-----------------|--------|
| <b>RNU44</b>       | <b>PROBE ID</b> | 001094 |
| <b>hsa-miR-10b</b> | <b>PROBE ID</b> | 002218 |

**Supplementary Table 4.** List of primary antibodies employed in Western Blots.

| <b>Antibody</b> | <b>Cat. no.</b> | <b>Supplier</b>           |
|-----------------|-----------------|---------------------------|
| <b>BAD</b>      | #9292           | Cell Signaling Technology |
| <b>BCL-2</b>    | #2872           | Cell Signaling Technology |
| <b>CDK6</b>     | #13331          | Cell Signaling Technology |
| <b>p-AKT</b>    | #9271           | Cell Signaling Technology |
| <b>p-ERK</b>    | #9101           | Cell Signaling Technology |
| <b>p-PTEN</b>   | #9551           | Cell Signaling Technology |
| <b>Tubulin</b>  | sc-5286         | Santa Cruz Biotechnology  |
